# Supplementary material for: From correlation to causation: Estimating effective connectivity from zero-lag covariances of brain signals
Source: PubMed Central journal article supplement (PMC5886625; doi:10.1371/journal.pcbi.1006056), 2018-03-26
Supplement: pcbi.1006056.s001.pdf [file pcbi.1006056.s001.pdf]

# Supporting information

---

## Algorithm 1 Conjugate gradient descent

---

- 1: initialize  $U, B_0$
  - 2: calculate gradient  $d$  and  $a \leftarrow \frac{1}{2}(d - d^*)$
  - 3: calculate step size  $\delta$
  - 4:  $U \leftarrow \exp(-\delta a)$
  - 5: **while** not converged **do**
  - 6:    $a' \leftarrow a$
  - 7:   calculate gradient  $a$
  - 8:    $\beta \leftarrow \frac{\langle a, a+a' \rangle}{\langle a', a' \rangle}$
  - 9:    $g \leftarrow -a - \beta a'$
  - 10:   calculate step size  $\delta$  of  $g$
  - 11:    $U \leftarrow \exp(\delta g)$
  - 12: Linesearch( $U, B_0$ )
- 

---

## Algorithm 2 Line Search with Armijo step size rule

---

- 1: **function** LINESEARCH( $U_{\text{act}}, d, \alpha$ ) ▷ current estimate  $U_{\text{act}}$ , gradient  $d$ , initial-step length  $\alpha$
  - 2:    $U \leftarrow \exp(-\alpha d)$
  - 3:    $Q \leftarrow UU$
  - 4:   **while**  $\Gamma(U_{\text{act}}B_0) - \Gamma(QB_0) \geq \alpha \langle d, d \rangle$  **do**
  - 5:      $U \leftarrow Q$
  - 6:      $Q \leftarrow UU$
  - 7:      $\alpha \leftarrow 2\alpha$
  - 8:   **while**  $\Gamma(U_{\text{act}}B_0) - \Gamma(UB_0) \geq 0.5\alpha \langle d, d \rangle$  **do**
  - 9:      $U \leftarrow \exp(-\alpha d)$
  - 10:    $\alpha \leftarrow 0.5\alpha$
  - 10:   **return**  $U, \alpha$
- 

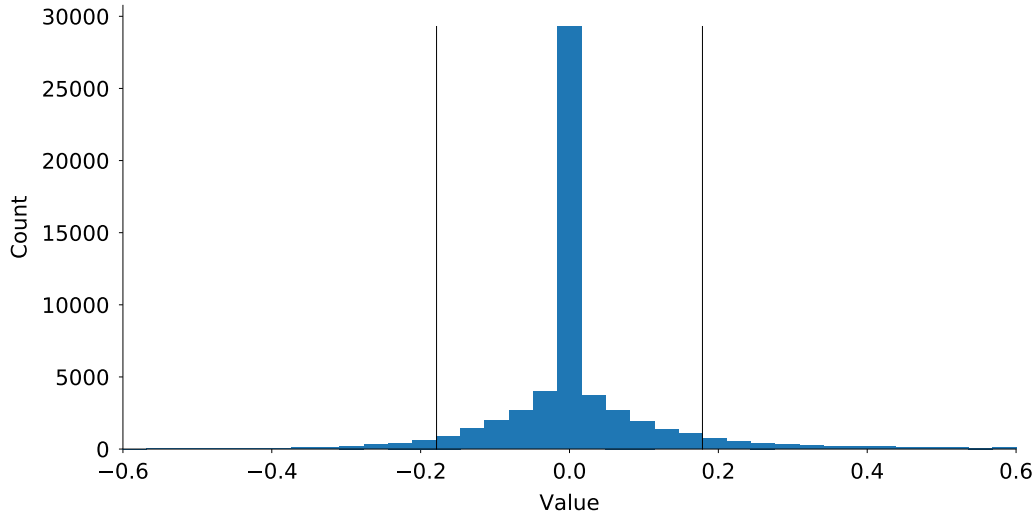

[H]  
**Figure A.** Histogram of estimated connection strengths taken from the reconstructed networks of all seven subjects. The vertical lines show the thresholds for the excitatory and inhibitory connections, respectively. Only a part of the histogram is shown, the actual range of values is between  $-0.99$  and  $2.54$ .

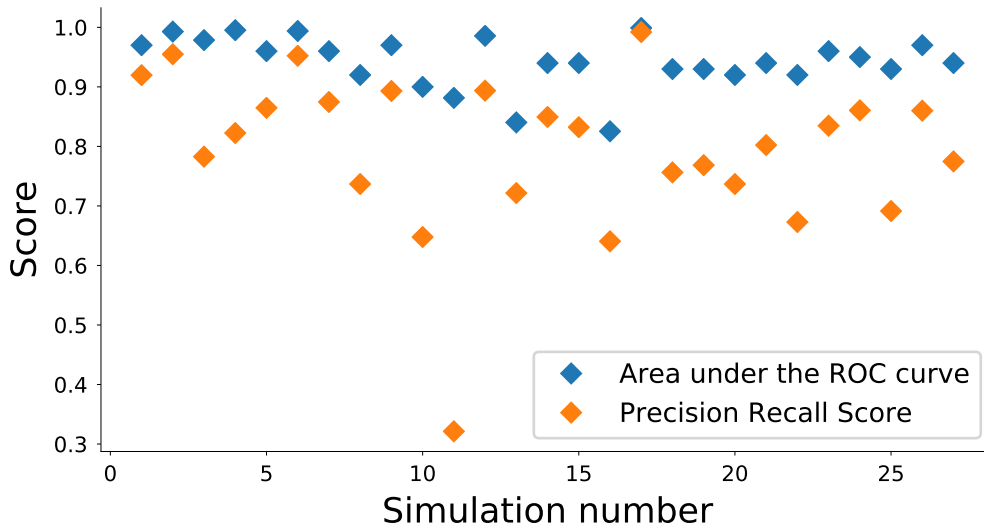

**Figure B.** Performance of our new inference method on the *NetSim* dataset published by [4]. Other methods have also been tested on these simulated data sets [1, 2, 3]. The  $x$ -axis represent the indices of simulated data sets, as in the original publication. The  $y$ -axis shows the AUC and PRS of our estimations. We estimated the connectivity for every individual subject and applied a threshold of 50%, the resulting networks were then averaged over all available subjects/trials. Although the networks considered in this paper cover a range of parameters, where we found that our method performs sub-optimally (the networks are generally too small), it still performs reasonably well on these synthetic data. We obtained average values for AUC and PRS of 0.94 and 0.79, respectively.

## References

- [1] Nie L, Yang X, Matthews PM, Xu ZW, and Guo YK. Inferring functional connectivity in fMRI using minimum partial correlation. *International Journal of Automation and Computing*, 14:371–385, 2017. doi:10.1007/s11633-017-1084-9
- [2] Ryali S, Chen T, Supekar K, Tu T, Kochalka J, Cai W, and Menon V. Multivariate dynamical systems-based estimation of causal brain interactions in fMRI: Group-level validation using benchmark data, neurophysiological models and human connectome project data. *Journal of Neuroscience Methods*, 268:142–153, 2016. doi:10.1016/j.jneumeth.2016.03.010
- [3] Hyvärinen A and Smith SM. Pairwise likelihood ratios for estimation of non-gaussian structural equation models. *Journal of Machine Learning Research*, 14(1):111–152, 2013.
- [4] Smith SM, Miller KL, Salimi-Khorshidi G, Webster M, Beckmann CF, Nichols TE, Ramsey JD, Woolrich MW. Network modelling methods for fMRI. *NeuroImage* 2011;54;2:875–891. doi:10.1016/j.neuroimage.2010.08.063.
- [5] Zaghlool SB and Wyatt CL. Missing data estimation in fMRI dynamic causal modeling. *Frontiers in Neuroscience*, 8:191, 2014. doi:10.3389/fnins.2014.00191
